# Supplementary material for: Combining iodic acid and nitric acid to fabricate carbon nitride tubes for enhanced hydrogen evolution under visible light
Source: Royal Society of Chemistry journal article supplement (doi:10.1039/c8cy02006j), 2018-12-04
Supplement: c8cy02006j1.pdf [file c8cy02006j1.pdf]

## Electronic Supplementary Information

### Combining iodic acid and nitric acid to fabricate carbon nitride tubes for enhanced hydrogen evolution under visible light

Guifang Ge and Zhongkui Zhao\*

*State Key Laboratory of Fine Chemicals, Department of Catalysis Chemistry and Engineering, School of Chemical Engineering, Dalian University of Technology, Dalian 116024, P. R. China.*

### Experimental

#### *Synthesis of catalysts*

**Preparation of Nitric acid-carbon nitride (N-CN):** 0.8 g melamine and HNO<sub>3</sub> were dissolved in 80 ml deionized water (the PH value is 1), followed by stirring vigorously for one hour. Then the white mixture was transferred to an autoclave with Teflon liner, heated at 180 °C for 10 hours. The turbid liquid was filtered, washed with deionized water, and dried at 60 °C for 12h. Finally, the powder was calcinated at 500 °C for 4 hours under N<sub>2</sub> flow.

**Preparation of Iodic acid-carbon nitride (I-CN):** The process is same as above, but replace HNO<sub>3</sub> with 1.5 g HIO<sub>3</sub>.

**Preparation of I/N-CN:** The process is same as above, but use 0.75 g HIO<sub>3</sub> and HNO<sub>3</sub> to adjust PH value.

**Preparation of HCN:** The process is same as above, however, no acid was introduced.

#### *Materials characterization*

Scanning electron microscopy (SEM) images were obtained by using JEOL JSM- 5600LV. X-ray diffraction (XRD) profiles were obtained on an Rigaku Automatic X-ray Diffractometer (D/Max 2400). The XPS spectra were performed on an ESCALAB 250 XPS system with Al K $\alpha$  X-ray source. Nitrogen adsorption and desorption isotherms were characterized on a Beishide apparatus of model 3H-2000PS1 system at 77 K. Fourier transform infrared (FT-IR) spectra were obtained on Bruker EQUINOX55 infrared spectrometer. The Photoluminescence spectra (PL) were recored on a fluorescence spectrometer (Hitachi F-7000). UV-vis spectra were measured using a UV-Vis spectrometer (JASCO V-550).

### Photocatalytic activity measurement

Photocatalytic hydrogen generation reactions of all the samples were carried out in a glass gas circulation system at 15 °C, 10 mg catalyst was added into 100 ml TEOA aqueous solution with a concentration of 10 vol.%. Pt as co-catalyst (3 wt%) was by photodeposition of H<sub>2</sub>PtCl<sub>6</sub>. Visible irradiation were conducted by a 300W Xenon lamp (PLS-SXE300/300UV, Perfectlight) with a cut-off filter ( $\geq 420$  nm). The evolved hydrogen was analyzed by using gas chromatograph (GC9790, FuLi). The apparent quantum yield (AQY, %) was measured using 50 mg catalyst in the same system, calculated as follow:

$$\text{AQY (\%)} = N_e/N_p = 2N_{\text{H}_2}/N_p$$

### Photoelectrochemical analysis

The photocurrent responses were carried out on a CHI660E workstation (Chenhua, Shanghai, China) using a conventional three-electrode cell. Pt pole was used as counter electrode, Ag/AgCl electrode as the reference electrode, 0.5 M Na<sub>2</sub>SO<sub>4</sub> aqueous solution was used as electrolyte. The working electrodes were prepared as follow: 10 mg of catalyst was suspended in 500  $\mu$ L terpinenol to form homogeneous suspension that was then dipped and spin-coated onto a 2.0 cm  $\times$  2.0 cm indium-tin oxide (ITO) glass.

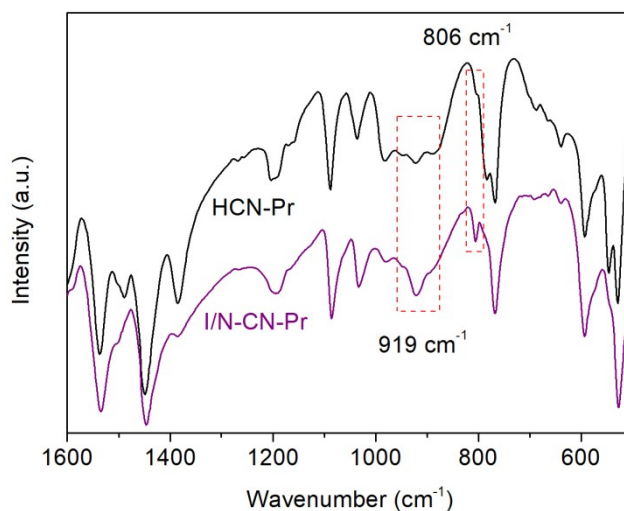

**Figure S1** FTIR spectra of HCN precursor, I/N-CN precursor.

To explore the existence of NO<sub>3</sub><sup>-</sup> and IO<sub>3</sub><sup>-</sup> in the I/N-CN precursor, FTIR spectra was applied (Figure S2). The peak at 919 cm<sup>-1</sup> is assigned to NO<sub>3</sub><sup>-</sup>,<sup>1</sup> the peak in 806 cm<sup>-1</sup> is ascribed to IO<sub>3</sub><sup>-</sup>.<sup>2</sup> These attest to the existence of nitric acid and iodic acid in the supramolecular aggregates.

**Table S1**

XPS analysis of the samples.

| Samples | N (%) | N <sub>2C</sub> (%) | N <sub>3C</sub> (%) | C (%) | C-C (%) | C-NH <sub>x</sub> (%) | N-C=N (%) |
|---------|-------|---------------------|---------------------|-------|---------|-----------------------|-----------|
| HCN     | 33.0  | 82.1                | 8.6                 | 58.2  | 47.0    | 8.1                   | 44.9      |
| N-CN    | 41.9  | 64.7                | 23.4                | 52.9  | 34.6    | 11.5                  | 53.9      |
| I-CN    | 47.3  | 69.1                | 16.3                | 48.7  | 34.7    | 3.4                   | 61.9      |
| I/N-CN  | 45.2  | 68.4                | 20.5                | 47.8  | 26.9    | 12.7                  | 60.6      |

**Table S2**

Textural properties of the catalysts.

| Samples | S <sub>BET</sub> <sup>a</sup> (m <sup>2</sup> g <sup>-1</sup> ) | V <sub>total</sub> <sup>b</sup> (cm <sup>3</sup> g <sup>-1</sup> ) |
|---------|-----------------------------------------------------------------|--------------------------------------------------------------------|
| HCN     | 13.6                                                            | 0.14                                                               |
| N-CN    | 19.9                                                            | 0.17                                                               |
| I-CN    | 15.2                                                            | 0.19                                                               |
| I/N-CN  | 18.4                                                            | 0.24                                                               |

a The total surface area (S<sub>total</sub>) was obtained from multipoint Brunauer–Emmett–Teller (BET) plots and V–t plots, respectively. b The total pore volume (V<sub>total</sub>) was determined at P/P<sub>0</sub> = 0.99, and the micropore volume (V<sub>micro</sub>) was calculated from the H-K plot.

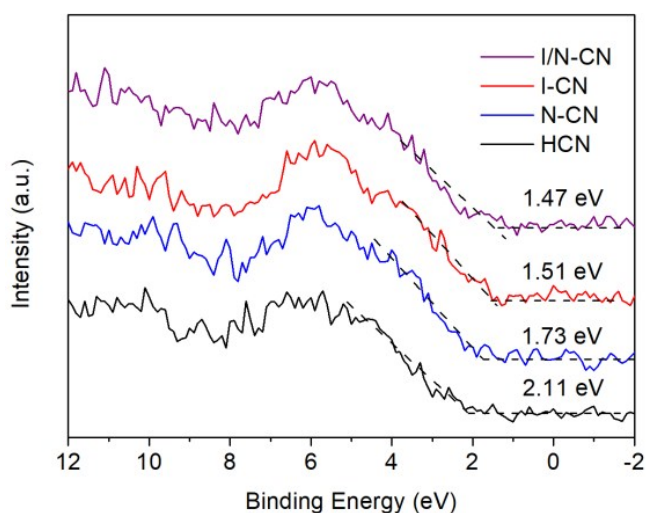

**Figure S2** XPS valence band spectra.

- 1 M. Rivallan, G. Ricchiardi, S. Bordiga and A. Zecchina, *J. Catal.*, 2009, **264**, 104–116
- 2 G. Pracht and H. D. Lutz, *Thermochim. Acta*, 2000, **354**, 153-160
